# Supplementary material for: The Effects of Glucose Lowering Agents on the Secondary Prevention of Coronary Artery Disease in Patients with Type 2 Diabetes
Source: PubMed Central journal article supplement — Endocrinol Metab (Seoul). 2021 Oct 14;36(5):977–87. doi: 10.3803/EnM.2021.1046 (PMC8566121; doi:10.3803/enm.2021.1046), 2021-10-14
Supplement: enm-2021-1046-suppl1.pdf [file enm-2021-1046-suppl1.pdf]

**Supplemental Table S1.** Risk of Repeat Revascularization According to Patients' Prescribed Glucose Lowering Agents among New Users

|                     | No.   | Repeat PCI | Duration  | IR, /1,000 PY | HR (95% CI)      |                   |                  |                  |                   |
|---------------------|-------|------------|-----------|---------------|------------------|-------------------|------------------|------------------|-------------------|
|                     |       |            |           |               | Model 1          | Model 2           | Model 3          | Model 4          | Model 5           |
| <b>Insulin</b>      |       |            |           |               |                  |                   |                  |                  |                   |
| No                  | 4,743 | 462        | 21,258.20 | 21.73         | 1 (reference)    | 1 (reference)     | 1 (reference)    | 1 (reference)    | 1 (reference)     |
| Yes                 | 1,159 | 108        | 5,101.00  | 21.17         | 0.97 (0.79–1.20) | 0.98 (0.79–1.21)  | 0.98 (0.78–1.22) | 0.97 (0.78–1.20) | 0.96 (0.77–1.19)  |
| <b>Sulfonylurea</b> |       |            |           |               |                  |                   |                  |                  |                   |
| No                  | 4,693 | 449        | 20,744.33 | 21.64         | 1 (reference)    | 1 (reference)     | 1 (reference)    | 1 (reference)    | 1 (reference)     |
| Yes                 | 1,209 | 121        | 5,614.87  | 21.55         | 1.03 (0.84–1.26) | 1.02 (0.83–1.25)  | 1.03 (0.78–1.36) | 1.07 (0.81–1.41) | 1.07 (0.811–1.42) |
| <b>Metformin</b>    |       |            |           |               |                  |                   |                  |                  |                   |
| No                  | 3,033 | 292        | 13,503.34 | 21.62         | 1 (reference)    | 1 (reference)     | 1 (reference)    | 1 (reference)    | 1 (reference)     |
| Yes                 | 2,869 | 278        | 12,855.86 | 21.62         | 1.01 (0.85–1.19) | 0.99 (0.84–1.17)  | 0.97 (0.72–1.29) | 0.91 (0.68–1.22) | 0.91 (0.68–1.23)  |
| <b>Meglitinides</b> |       |            |           |               |                  |                   |                  |                  |                   |
| No                  | 5,823 | 558        | 26,017.69 | 21.45         | 1 (reference)    | 1 (reference)     | 1 (reference)    | 1 (reference)    | 1 (reference)     |
| Yes                 | 79    | 12         | 341.52    | 35.14         | 1.65 (0.93–2.92) | 1.68 (0.95–2.97)  | 1.72 (0.96–3.10) | 1.73 (0.96–3.12) | 1.76 (0.97–3.16)  |
| <b>TZD</b>          |       |            |           |               |                  |                   |                  |                  |                   |
| No                  | 5,841 | 568        | 26,105.51 | 21.76         | 1 (reference)    | 1 (reference)     | 1 (reference)    | 1 (reference)    | 1 (reference)     |
| Yes                 | 61    | 2          | 253.69    | 7.88          | 0.35 (0.09–1.40) | 0.362 (0.09–1.45) | 0.35 (0.09–1.43) | 0.35 (0.09–1.43) | 0.36 (0.09–1.44)  |
| <b>DPP4i</b>        |       |            |           |               |                  |                   |                  |                  |                   |
| No                  | 4,929 | 478        | 22,151.90 | 21.58         | 1 (reference)    | 1 (reference)     | 1 (reference)    | 1 (reference)    | 1 (reference)     |
| Yes                 | 973   | 92         | 4,207.30  | 21.87         | 1.00 (0.80–1.25) | 0.98 (0.79–1.23)  | 0.96 (0.72–1.29) | 0.98 (0.73–1.32) | 0.98 (0.73–1.32)  |
| <b>AGI</b>          |       |            |           |               |                  |                   |                  |                  |                   |
| No                  | 5,736 | 552        | 25,519.39 | 21.63         | 1 (reference)    | 1 (reference)     | 1 (reference)    | 1 (reference)    | 1 (reference)     |
| Yes                 | 166   | 18         | 839.81    | 21.43         | 1.07 (0.67–1.72) | 1.06 (0.66–1.69)  | 1.06 (0.65–1.73) | 1.05 (0.64–1.71) | 1.02 (0.62–1.67)  |

The incidence rate is presented per 1,000 person-years (PY).

Model 1: Adjusted for age and sex; Model 2: Adjusted model 1+adjusted for household income, hypertension, dyslipidemia, current smoking, alcohol, regular exercise, and body mass index; Model 3: Adjusted model 2+adjusted for use of insulin, number of oral antidiabetic drugs; Model 4: Adjusted model 3+adjusted for fasting blood glucose; Model 5: Adjusted model 4+adjusted for duration of diabetes.

PCI, percutaneous coronary intervention; IR, incidence rate; HR, hazard ratio; CI, confidence interval; TZD, thiazolidinedione; DPP4i, dipeptidyl peptidase-4 inhibitor; AGI, alpha glucosidase inhibitor.
