# Supplementary material for: The Effects of Glucose Lowering Agents on the Secondary Prevention of Coronary Artery Disease in Patients with Type 2 Diabetes
Source: PubMed Central journal article supplement — Endocrinol Metab (Seoul). 2021 Oct 14;36(5):977–87. doi: 10.3803/EnM.2021.1046 (PMC8566121; doi:10.3803/enm.2021.1046), 2021-10-14
Supplement: enm-2021-1046-suppl2.pdf [file enm-2021-1046-suppl2.pdf]

**Supplemental Table S2.** Risk of Repeat Revascularization among Patients Who Have Changed Their Oral Glucose Lowering Agents after the Index Date of PCI

|                     | No.    | Repeat PCI | Duration   | IR, /1,000 PY | HR (95% CI)      |                  |                  |                  |                  |
|---------------------|--------|------------|------------|---------------|------------------|------------------|------------------|------------------|------------------|
|                     |        |            |            |               | Model 1          | Model 2          | Model 3          | Model 4          | Model 5          |
| <b>Sulfonylurea</b> |        |            |            |               |                  |                  |                  |                  |                  |
| No                  | 12,938 | 1,363      | 55,734.48  | 24.46         | 1 (reference)    |
| Yes                 | 14,942 | 1,607      | 66,681.68  | 24.10         | 1.00 (0.93–1.08) | 1.0 (0.93–1.07)  | 1.17 (1.06–1.30) | 1.17 (1.06–1.30) | 1.13 (1.02–1.25) |
| <b>Metformin</b>    |        |            |            |               |                  |                  |                  |                  |                  |
| No                  | 7,656  | 949        | 32,746.10  | 28.98         | 1 (reference)    |
| Yes                 | 20,224 | 2,021      | 89,670.06  | 22.54         | 0.78 (0.72–0.84) | 0.78 (0.72–0.84) | 0.75 (0.67–0.84) | 0.75 (0.67–0.85) | 0.79 (0.70–0.88) |
| <b>Meglitinides</b> |        |            |            |               |                  |                  |                  |                  |                  |
| No                  | 27,358 | 2,897      | 120,102.18 | 24.12         | 1 (reference)    |
| Yes                 | 522    | 73         | 2,313.98   | 31.55         | 1.33 (1.06–1.68) | 1.30 (1.03–1.65) | 1.22 (0.97–1.54) | 1.22 (0.97–1.54) | 1.18 (0.93–1.49) |
| <b>TZD</b>          |        |            |            |               |                  |                  |                  |                  |                  |
| No                  | 26,989 | 2,901      | 118,407.81 | 24.50         | 1 (reference)    |
| Yes                 | 891    | 69         | 4,008.35   | 17.21         | 0.70 (0.55–0.89) | 0.71 (0.56–0.90) | 0.75 (0.59–0.95) | 0.75 (0.59–0.95) | 0.73 (0.58–0.93) |
| <b>DPP4i</b>        |        |            |            |               |                  |                  |                  |                  |                  |
| No                  | 19,226 | 2,184      | 86,257.93  | 25.32         | 1 (reference)    |
| Yes                 | 8,654  | 786        | 36,158.23  | 21.74         | 0.82 (0.75–0.89) | 0.82 (0.76–0.89) | 0.86 (0.78–0.95) | 0.86 (0.78–0.94) | 0.87 (0.79–0.96) |
| <b>AGI</b>          |        |            |            |               |                  |                  |                  |                  |                  |
| No                  | 25,261 | 2,633      | 109,856.37 | 23.97         | 1 (reference)    |
| Yes                 | 2,619  | 337        | 12,559.79  | 26.83         | 1.19 (1.06–1.33) | 1.18 (1.06–1.33) | 1.29 (1.15–1.46) | 1.29 (1.15–1.46) | 1.28 (1.14–1.45) |

The incidence rate is presented per 1,000 person-years (PY).

Model 1: Adjusted for age and sex; Model 2: Adjusted model 1+adjusted for household income, hypertension, dyslipidemia, current smoking, alcohol, regular exercise, and body mass index; Model 3: Adjusted model 2+adjusted for use of insulin, number of oral antidiabetic drugs; Model 4: Adjusted model 3+adjusted for fasting blood glucose; Model 5: Adjusted model 4+adjusted for duration of diabetes.

PCI, percutaneous coronary intervention; IR, incidence rate; HR, hazard ratio; CI, confidence interval; TZD, thiazolidinedione; DPP4i, dipeptidyl peptidase-4 inhibitor; AGI, alpha glucosidase inhibitor.
