# Supplementary material for: The Effects of Glucose Lowering Agents on the Secondary Prevention of Coronary Artery Disease in Patients with Type 2 Diabetes
Source: PubMed Central journal article supplement — Endocrinol Metab (Seoul). 2021 Oct 14;36(5):977–87. doi: 10.3803/EnM.2021.1046 (PMC8566121; doi:10.3803/enm.2021.1046), 2021-10-14
Supplement: enm-2021-1046-suppl4.pdf [file enm-2021-1046-suppl4.pdf]

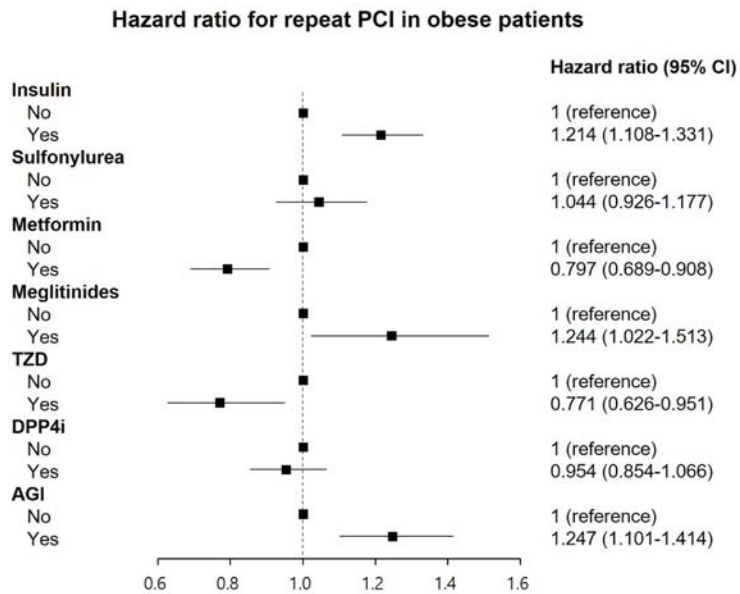

**Supplemental Fig. S2.** Hazard ratio for repeat revascularizations in obese patients. PCI, percutaneous coronary intervention; CI, confidence interval; TZD, thiazolidinedione; DPP4i, dipeptidyl peptidase-4 inhibitor; AGI, alpha-glucosidase inhibitor.
